# Supplementary material for: High-throughput 3D microfluidic chip for generation of concentration gradients and mixture combinations
Source: Royal Society of Chemistry journal article supplement (doi:10.1039/d3lc00822c), 2024-01-01
Supplement: d3lc00822c1.pdf [file d3lc00822c1.pdf]

**Supplementary Information**

**High-throughput 3D microfluidic chip for generation of  
concentration gradients and solution combinations**

Mingwei Zhao<sup>a</sup>, Jing Yang<sup>b</sup>, Yuang Zeng<sup>c</sup>, Zhenqing Li<sup>a</sup>, Bo Dai<sup>a</sup>, Chunxian Tao<sup>\*,a</sup>,

Dawei Zhang<sup>a</sup> and Yoshinori Yamaguchi<sup>d</sup>

<sup>a</sup>Engineering Research Center of Optical Instrument and System, Key Lab of Optical Instruments and Equipment for Medical Engineering, Ministry of Education, Shanghai Key Lab of Modern Optical System, University of Shanghai for Science and Technology, Shanghai 200093, China

<sup>b</sup>Anhui Sanlian University, Hefei 230000, China

<sup>c</sup>Shanghai Key Laboratory of Molecular Imaging, Shanghai University of Medicine and Health Sciences, Shanghai 201318, China

<sup>d</sup>Comprehensive Research Organization, Waseda University, Tokyo, Japan. 162-0041

*Corresponding Authors:*

*\*Chunxian Tao, [tao@usst.edu.cn](mailto:tao@usst.edu.cn).*

Supplementary Figures:

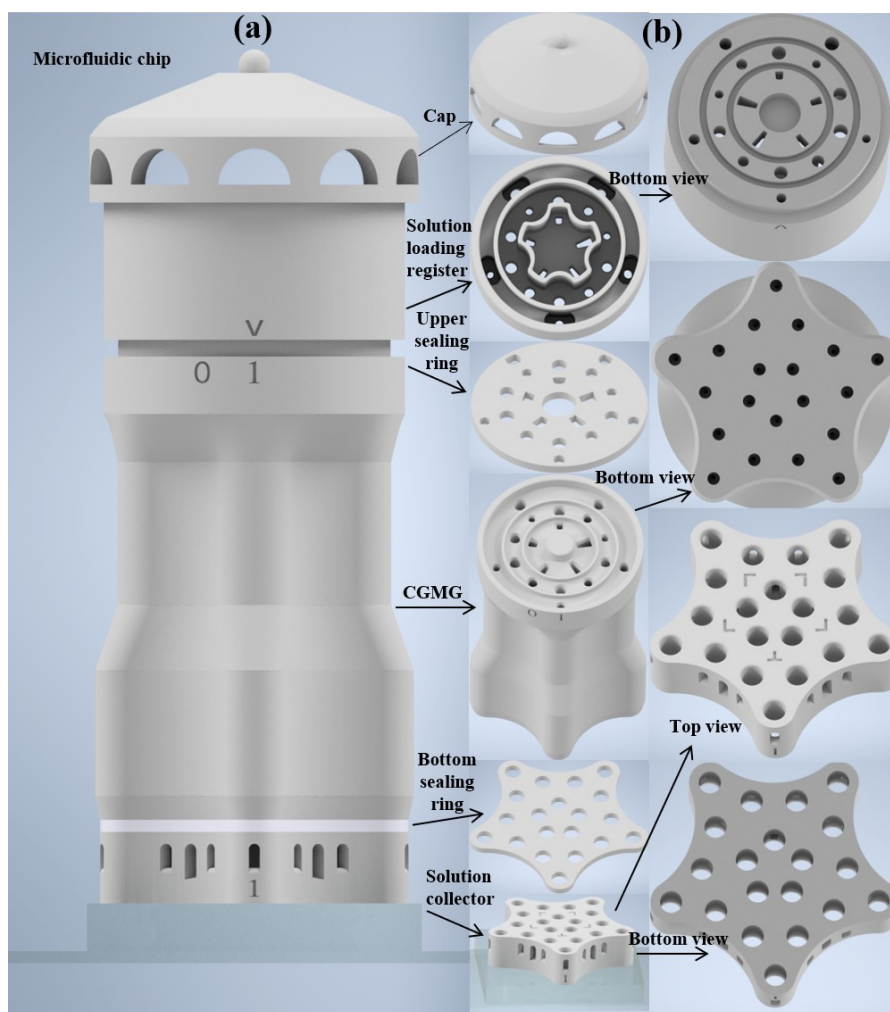

**Fig. S1** Rendering of the external surface of the microfluidic device and its components. (a) 3D rendering of the surface of the microfluidic device. (b) Rendering of the outer surface of each component.

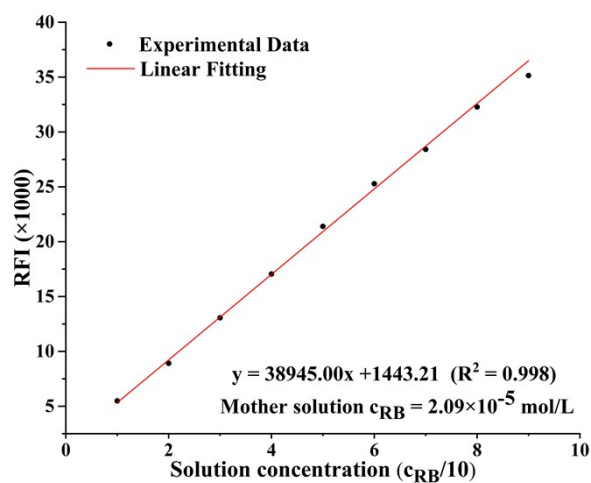

**Fig. S2** Configure the linear fitting graph of the solubility value and the fluorescence intensity of the concentration gradient Rhodamine B fluorescent dye. (Where  $x$  represents the relative concentration of the Rhodamine B solution (in units of  $c_{RB}$ ), and  $y$  denotes the fluorescence

intensity.)

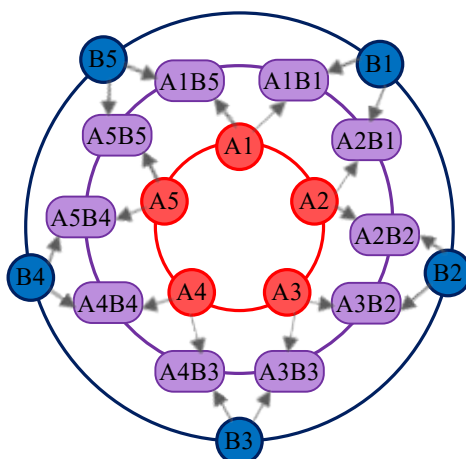

**Fig. S3** Inefficient model of mixed structure of gradient solution.

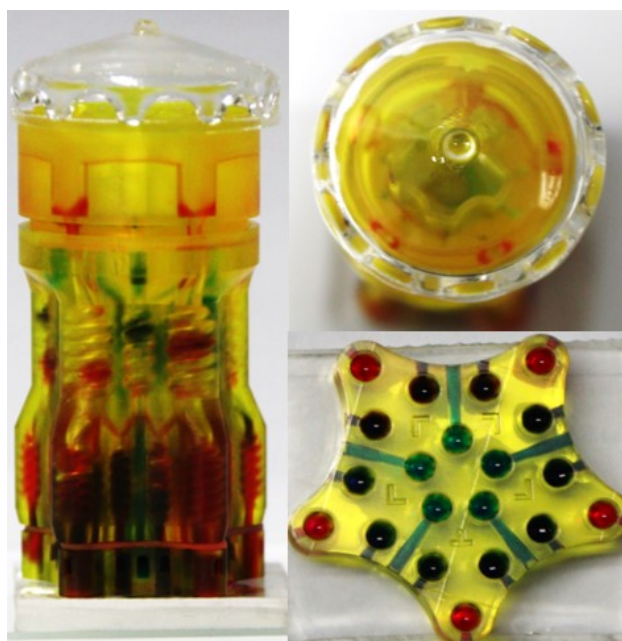

**Fig. S4** The chip verification completes the physical map.

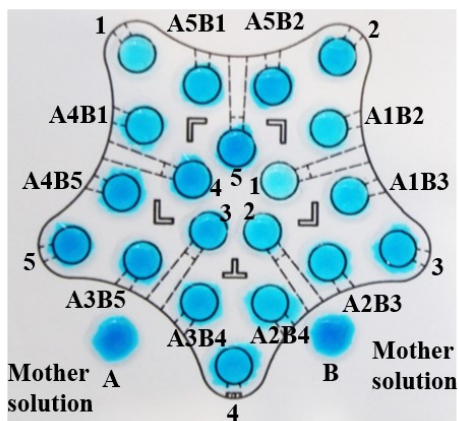

**Fig. S5** Image of blue ink solution produced by the chip.

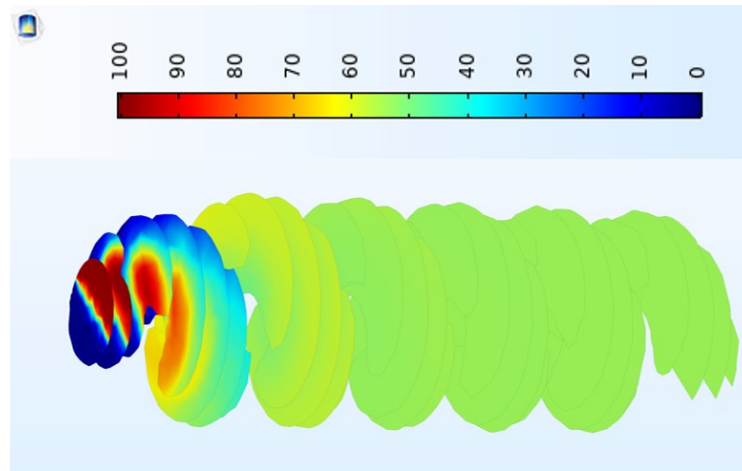

**Fig. S6** The simulation of the fluid dynamics was performed for the spiral channels in the chip. A thermal color plot of the concentration distribution when the diffusion coefficient is  $4.5 \times 10^{-10} \text{ m}^2/\text{s}$ .

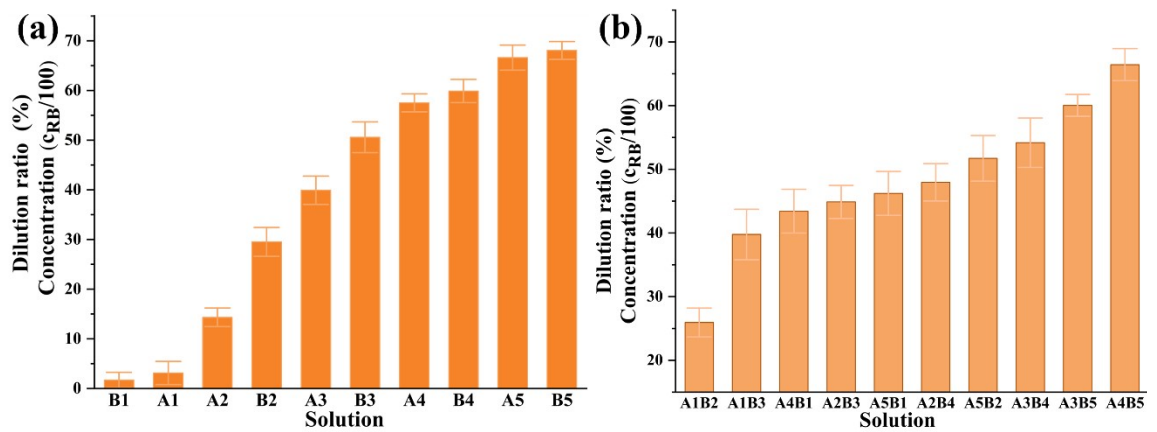

**Fig. S7** Single solution loading scheme: (a)(b) Concentration diagram of diluted solutions.

**Supplementary Tables:**

**Table S1** Physical properties table of 3D printed biological application materials.

|                      | Biological application |       |
|----------------------|------------------------|-------|
| Photosensitive resin | BIO                    | PEGDA |
| The tensile strength | 42MPa                  | 1MPa  |

|                                          |                    |                                      |
|------------------------------------------|--------------------|--------------------------------------|
| Modulus of elasticity                    | 2.4GPa             | 35MPa                                |
| Elongation at break                      | 2.5%               | 3.5%                                 |
| The bending strength                     | 65MPa              | -                                    |
| Bending modulus                          | 2GPa               | -                                    |
| Thermal deformation temperature @0.45MPa | 100°C              | 40°C                                 |
| Hardness                                 | 80 Shore D         | 27 Shore D                           |
| The standard color                       | Translucent yellow | Translucent yellow, black            |
| other                                    | Biocompatibility   | Biocompatible, low modulus materials |

**Table S2** Gradient solution mixing group table.

| Solution combination |             |             |             |             |
|----------------------|-------------|-------------|-------------|-------------|
| <i>A1B1</i>          | A1B2        | A1B3        | A1B4        | A1B5        |
| A2B1                 | <i>A2B2</i> | A2B3        | A2B4        | A2B5        |
| A3B1                 | A3B2        | <i>A3B3</i> | A3B4        | A3B5        |
| A4B1                 | A4B2        | A4B3        | <i>A4B4</i> | A4B5        |
| A5B1                 | A5B2        | A5B3        | A5B4        | <i>A5B5</i> |

**Table S3** The concentration of Am and Bn and the ratio of solution to volume.

| Solution                       | A1   | A2   | A3   | A4   | A5   | B1   | B2   | B3   | B4   | B5   |
|--------------------------------|------|------|------|------|------|------|------|------|------|------|
| Concentration ( $c_{RB}/100$ ) | 33.4 | 42.5 | 60.1 | 85.7 | 96.9 | 31.9 | 40.1 | 49.4 | 70.5 | 98.3 |
| $V_r(/100)$                    | 33.4 | 42.5 | 60.1 | 85.7 | 96.9 | 31.9 | 40.1 | 49.4 | 70.5 | 98.3 |

**Table S4** AmBn concentration and mixing volume ratio.

| Solution                       | A1B4  | A1B5  | A2B5  | A2B1  | A3B1  | A3B2  | A4B2  | A4B3  | A5B3  | A5B4  |
|--------------------------------|-------|-------|-------|-------|-------|-------|-------|-------|-------|-------|
| Concentration ( $c_{RB}/100$ ) | 48.28 | 53.79 | 56.59 | 33.57 | 39.97 | 45.83 | 52.05 | 55.13 | 60.23 | 74.06 |
| $V_{r(A_m)}$                   | 0.599 | 0.686 | 0.747 | 0.155 | 0.285 | 0.286 | 0.262 | 0.158 | 0.228 | 0.136 |
| $V_{r(B_n)}$                   | 0.402 | 0.314 | 0.253 | 0.846 | 0.715 | 0.714 | 0.738 | 0.842 | 0.772 | 0.865 |

**Table S5** Solutions A and B were loaded into the inner and outer ring chambers respectively to generate solutions and their concentrations.

| The solution produced by the chip |             |             |             |             |             |             |             |             |             |             |
|-----------------------------------|-------------|-------------|-------------|-------------|-------------|-------------|-------------|-------------|-------------|-------------|
| <b>Solution</b>                   | <b>A1</b>   | <b>A2</b>   | <b>A3</b>   | <b>A4</b>   | <b>A5</b>   | <b>B1</b>   | <b>B2</b>   | <b>B3</b>   | <b>B4</b>   | <b>B5</b>   |
| Concentration                     | 33.4        | 42.5        | 60.1        | 85.7        | 96.9        | 31.9        | 40.1        | 49.4        | 70.5        | 98.3        |
| ( $c_A$ or $c_B/100$ )            | $\pm 2.5$   | $\pm 1.8$   | $\pm 2.9$   | $\pm 1.9$   | $\pm 2.3$   | $\pm 1.8$   | $\pm 2.4$   | $\pm 3.1$   | $\pm 2.9$   | $\pm 1.6$   |
| <b>Solution</b>                   | <b>A1B4</b> | <b>A1B5</b> | <b>A2B5</b> | <b>A2B1</b> | <b>A3B1</b> | <b>A3B2</b> | <b>A4B2</b> | <b>A4B3</b> | <b>A5B3</b> | <b>A5B4</b> |
| A<br>Concentration                | 20.0        | 22.9        | 31.8        | 6.6         | 17.2        | 17.2        | 22.5        | 13.5        | 22.1        | 13.1        |
| ( $c_A/100$ )                     | $\pm 1.5$   | $\pm 1.7$   | $\pm 1.4$   | $\pm 0.3$   | $\pm 0.8$   | $\pm 0.8$   | $\pm 0.5$   | $\pm 0.3$   | $\pm 0.5$   | $\pm 0.3$   |
| B<br>Concentration                | 28.3        | 30.9        | 24.8        | 27.0        | 22.8        | 28.6        | 29.6        | 41.6        | 38.2        | 60.9        |
| ( $c_B/100$ )                     | $\pm 1.2$   | $\pm 0.5$   | $\pm 0.4$   | $\pm 1.5$   | $\pm 1.3$   | $\pm 1.7$   | $\pm 1.7$   | $\pm 2.6$   | $\pm 2.4$   | $\pm 2.5$   |

**Table S6** Solutions A and B were loaded into the outer and inner ring chambers respectively to generate solutions and their concentrations.

| The solution produced by the chip |             |             |             |             |             |             |             |             |             |             |
|-----------------------------------|-------------|-------------|-------------|-------------|-------------|-------------|-------------|-------------|-------------|-------------|
| <b>Solution</b>                   | <b>A1</b>   | <b>A2</b>   | <b>A3</b>   | <b>A4</b>   | <b>A5</b>   | <b>B1</b>   | <b>B2</b>   | <b>B3</b>   | <b>B4</b>   | <b>B5</b>   |
| Concentration                     | 31.9        | 40.1        | 49.4        | 70.5        | 98.3        | 33.4        | 42.5        | 60.1        | 85.7        | 96.9        |
| ( $c_A$ or $c_B/100$ )            | $\pm 1.8$   | $\pm 2.4$   | $\pm 3.1$   | $\pm 2.9$   | $\pm 1.6$   | $\pm 2.5$   | $\pm 1.8$   | $\pm 2.9$   | $\pm 1.9$   | $\pm 2.3$   |
| <b>Solution</b>                   | <b>A4B1</b> | <b>A5B1</b> | <b>A5B2</b> | <b>A1B2</b> | <b>A1B3</b> | <b>A2B3</b> | <b>A2B4</b> | <b>A3B4</b> | <b>A3B5</b> | <b>A4B5</b> |
| A solution<br>concentration       | 28.3        | 30.9        | 24.8        | 27.0        | 22.8        | 28.6        | 29.6        | 41.6        | 38.2        | 60.9        |
| ( $c_A/100$ )                     | $\pm 1.2$   | $\pm 0.5$   | $\pm 0.4$   | $\pm 1.5$   | $\pm 1.3$   | $\pm 1.7$   | $\pm 1.7$   | $\pm 2.6$   | $\pm 2.4$   | $\pm 2.5$   |
| B solution<br>concentration       | 20.0        | 22.8        | 31.8        | 6.6         | 17.1        | 17.2        | 22.5        | 13.5        | 22.1        | 13.1        |
| ( $c_B/100$ )                     | $\pm 1.5$   | $\pm 1.7$   | $\pm 1.4$   | $\pm 0.3$   | $\pm 0.8$   | $\pm 0.8$   | $\pm 0.5$   | $\pm 0.3$   | $\pm 0.5$   | $\pm 0.3$   |

**Table S7** Injection of dilution solution into the outer and inner ring chambers, and mother liquor with a concentration of  $c_{RB}$  into the central ring chamber. There are the concentrations of the generated solutions.

| The concentration of Am, Bn, and AmBn |             |             |             |             |             |             |             |             |             |             |
|---------------------------------------|-------------|-------------|-------------|-------------|-------------|-------------|-------------|-------------|-------------|-------------|
| <b>Solution</b>                       | <b>A1</b>   | <b>A2</b>   | <b>A3</b>   | <b>A4</b>   | <b>A5</b>   | <b>B1</b>   | <b>B2</b>   | <b>B3</b>   | <b>B4</b>   | <b>B5</b>   |
| Concentration                         | 3.1         | 14.3        | 39.9        | 57.5        | 66.6        | 1.7         | 29.5        | 50.6        | 59.9        | 68.1        |
| ( $c_{RB}/100$ )                      | $\pm 2.3$   | 1.9         | $\pm 2.9$   | $\pm 1.8$   | $\pm 2.5$   | $\pm 1.6$   | $\pm 2.9$   | $\pm 3.1$   | $\pm 2.4$   | $\pm 1.8$   |
| <b>Solution</b>                       | <b>A1B2</b> | <b>A1B3</b> | <b>A2B3</b> | <b>A2B4</b> | <b>A3B4</b> | <b>A3B5</b> | <b>A4B5</b> | <b>A4B1</b> | <b>A5B1</b> | <b>A5B2</b> |
| Concentration                         | 25.9        | 39.8        | 44.9        | 48.0        | 54.2        | 60.0        | 66.4        | 43.4        | 46.2        | 51.7        |
| ( $c_{RB}/100$ )                      | $\pm 2.3$   | $\pm 4.0$   | $\pm 2.6$   | $\pm 2.9$   | $\pm 3.9$   | $\pm 1.7$   | $\pm 2.5$   | $\pm 3.4$   | $\pm 3.5$   | $\pm 3.6$   |

**Injection of solution A and B into the outer and inner ring chambers respectively, and solution C into the central ring chamber:**

**Table S8** The concentration of ABC.

| The solution of ABC |           |           |           |           |           |           |           |           |           |           |
|---------------------|-----------|-----------|-----------|-----------|-----------|-----------|-----------|-----------|-----------|-----------|
| <b>Solution</b>     | <b>1</b>  | <b>2</b>  | <b>3</b>  | <b>4</b>  | <b>5</b>  | <b>6</b>  | <b>7</b>  | <b>8</b>  | <b>9</b>  | <b>10</b> |
| Concentration       | 13.1      | 60.9      | 22.1      | 38.2      | 31.8      | 24.8      | 13.5      | 41.6      | 22.9      | 30.9      |
| ( $c_A/100$ )       |           |           |           |           |           |           |           |           |           |           |
| Concentration       | 60.9      | 13.1      | 38.2      | 22.1      | 24.8      | 31.8      | 41.6      | 13.5      | 30.9      | 22.9      |
| ( $c_B/100$ )       |           |           |           |           |           |           |           |           |           |           |
| Concentration       | 25.9      | 25.9      | 39.8      | 39.8      | 43.4      | 43.4      | 44.9      | 44.9      | 46.2      | 46.2      |
| ( $c_C/100$ )       |           |           |           |           |           |           |           |           |           |           |
| <b>Solution</b>     | <b>11</b> | <b>12</b> | <b>13</b> | <b>14</b> | <b>15</b> | <b>16</b> | <b>17</b> | <b>18</b> | <b>19</b> | <b>20</b> |
| Concentration       | 22.5      | 29.6      | 20.0      | 28.3      | 17.2      | 28.6      | 17.1      | 22.8      | 6.6       | 27.0      |
| ( $c_A/100$ )       |           |           |           |           |           |           |           |           |           |           |
| Concentration       | 29.6      | 22.5      | 28.3      | 20.0      | 28.6      | 17.2      | 22.8      | 17.1      | 27.0      | 6.6       |
| ( $c_B/100$ )       |           |           |           |           |           |           |           |           |           |           |
| Concentration       | 48.0      | 48.0      | 51.7      | 51.7      | 54.2      | 54.2      | 60.0      | 60.0      | 66.4      | 66.4      |
| ( $c_C/100$ )       |           |           |           |           |           |           |           |           |           |           |

**Table S9** The concentration of AC and BC.

| The solution of AC or BC |  |  |  |  |  |  |  |  |  |  |
|--------------------------|--|--|--|--|--|--|--|--|--|--|
|--------------------------|--|--|--|--|--|--|--|--|--|--|

---

| Solution                                | 1    | 2    | 3    | 4    | 5    | 6    | 7    | 8    | 9    | 10   |
|-----------------------------------------|------|------|------|------|------|------|------|------|------|------|
| Concentration<br>( $c_A$ or $c_B$ /100) | 98.3 | 96.9 | 85.7 | 70.5 | 60.1 | 49.4 | 42.5 | 40.1 | 33.4 | 31.9 |
| Concentration<br>( $c_B$ /100)          | 1.7  | 3.1  | 14.3 | 29.5 | 39.9 | 50.6 | 57.5 | 59.9 | 66.6 | 68.1 |

---
